# Supplementary material
Source: Royal Society of Chemistry journal article supplement (doi:10.1039/d6cp00607h)
Supplement: d6cp00607h1.pdf [file d6cp00607h1.pdf]

## Supporting Information

### Deep Eutectic Solvent-Assisted Hydrothermal Synthesis of Chitosan-Based Nanohybrid Films Functionalized with Silver-Decorated Tungsten Oxide

Shephrah Olubusola Ogungbesan,<sup>\*a</sup> Oluwaseun Hanah Anselm,<sup>b</sup> Eduardo Buxaderas,<sup>c</sup> Yanina Moglie,<sup>c</sup> César Saldías,<sup>d</sup> Mulenga Kalulu,<sup>a</sup> Rosemary Anwuli Adedokun,<sup>e</sup> Enock Olugbenga Dare,<sup>f</sup> Michael Olawale Daramola,<sup>g</sup> David Díaz Díaz<sup>\*h,i</sup> and Guodong Fu<sup>\*a</sup>

<sup>a</sup>School of Chemistry and Chemical Engineering, Southeast University, 2 Southeast University Road, 211189 Nanjing, P. R. China. <sup>b</sup>College of Science and Information Technology, Tai Solarin University of Education, PMB 2118, Ijebu-Ode, Ogun State, Nigeria. <sup>c</sup>Instituto de Química del Sur, INQUISUR (CONICET-UNS), Departamento de Química, Universidad Nacional del Sur, Avda. Alem 1253, 8000 Bahía Blanca, Argentina. <sup>d</sup>Departamento de Química Física, Facultad de Química y de Farmacia, Pontificia Universidad Católica de Chile, Chile. <sup>e</sup>Department of Chemistry, Chrisland University Abeokuta, KM 3, Ajebo Road after FMC, 23409 Abeokuta, Nigeria. <sup>f</sup>College of Physical Sciences, Federal University of Agriculture Abeokuta, PMB 2240, Alabata Road, Abeokuta, Ogun State, Nigeria. <sup>g</sup>Sustainable Energy and Environment Research Group (SEERG), Department of Chemical Engineering, University of Pretoria, Hatfield 0028, Pretoria, South Africa. <sup>h</sup>AFM-NANO, Instituto Universitario de Bio-Orgánica Antonio González (IUBO-AG), Universidad de La Laguna, Avda. Astrofísico Francisco Sánchez 2, La Laguna 38206, Spain. <sup>i</sup>Departamento de Química Orgánica, Universidad de La Laguna, Avda. Astrofísico Francisco Sánchez 3, La Laguna 38206, Spain.

E- mail: 233189910@seu.edu.cn, fu7352@seu.edu.cn, dddiazdiaz@ull.edu.es

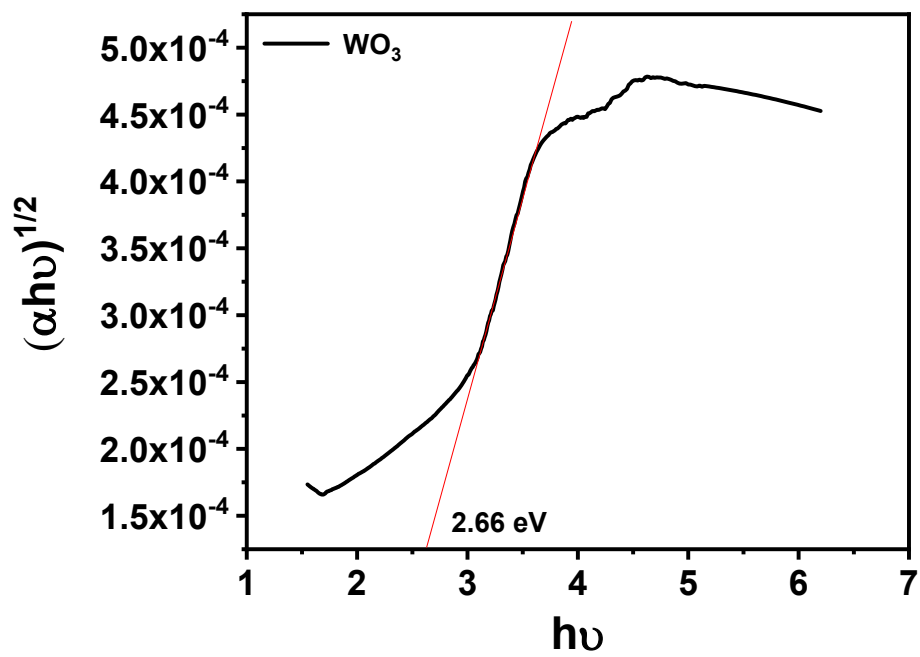

Fig. S1. Tauc band gap plot of  $\text{WO}_3$ .
